# Supplementary material for: Is There a “Gifted Personality”? Initial Evidence for Differences between MENSA and General Population Members in the HEXACO Personality Inventory
Source: MDPI journal article supplement (doi:10.3390/jintelligence10040092), 2022-10-26
Supplement: s1 [file s1]

**Supplementary Table S1.** Means and standard deviations for factor and facet scores

[illegible]

|                   |      |      |       |      |         |      |       |      |
|-------------------|------|------|-------|------|---------|------|-------|------|
| Aesthetic         | 3.67 | 0.99 | 3.56  | 1.01 | 3.58    | 1.01 | 3.34  | 1.09 |
| Appreciation      |      |      |       |      |         |      |       |      |
| Inquisitiveness   | 3.98 | 0.79 | 3.67  | 0.83 | 3.88    | 0.89 | 3.06  | 1.06 |
| Creativity        | 3.61 | 0.88 | 3.74  | 0.77 | 3.74    | 0.90 | 3.57  | 0.99 |
| Unconventionality | 3.82 | 0.69 | 3.79  | 0.65 | 3.82    | 0.71 | 3.48  | 0.73 |
| <i>n</i>          | 615  |      | 9,491 |      | 100,318 |      | 2,868 |      |

**Supplementary Table S2.** Detailed statistics for factor and facet level comparisons

| Study                   | Factor/facet      | <i>t</i> | <i>df</i> | Mean difference [95% <i>CI</i> ] | <i>p</i>  | <i>d</i> |
|-------------------------|-------------------|----------|-----------|----------------------------------|-----------|----------|
| Thielmann et al. (2020) | Honesty-Humility  | -6.75    | 695.55    | -0.18 [-0.23; -0.13]             | < .000001 | 0.28     |
| Thielmann et al. (2020) | Emotionality      | 12.86    | 672.25    | 0.36 [0.31; 0.42]                | < .000001 | -0.62    |
| Thielmann et al. (2020) | Extraversion      | 13.48    | 671.23    | 0.39 [0.34; 0.45]                | < .000001 | -0.65    |
| Thielmann et al. (2020) | Agreeableness     | -0.06    | 668.72    | 0.00 [-0.05; 0.05]               | .950181   | 0.00     |
| Thielmann et al. (2020) | Conscientiousness | -7.89    | 686.76    | -0.19 [-0.23; -0.14]             | < .000001 | 0.35     |
| Thielmann et al. (2020) | Openness          | -2.42    | 700.04    | -0.06 [-0.10; -0.01]             | .015744   | 0.10     |
| <b>Honesty-Humility</b> |                   |          |           |                                  |           |          |
| Thielmann et al. (2020) | Sincerity         | -8.69    | 694.68    | -0.30 [-0.37; -0.24]             | < .000001 | 0.36     |
| Thielmann et al. (2020) | Fairness          | -4.09    | 689.52    | -0.18 [-0.26; -0.09]             | .000049   | 0.18     |
| Thielmann et al. (2020) | Greed Avoidance   | -5.88    | 696.55    | -0.23 [-0.30; -0.15]             | < .000001 | 0.24     |
| Thielmann et al. (2020) | Modesty           | 1.58     | 679.33    | 0.06 [-0.01; 0.13]               | .114440   | -0.07    |
| <b>Emotionality</b>     |                   |          |           |                                  |           |          |
| Thielmann et al. (2020) | Fearfulness       | 6.44     | 680.11    | 0.23 [0.16; 0.30]                | < .000001 | -0.29    |
| Thielmann et al. (2020) | Anxiety           | 2.53     | 673.43    | 0.12 [0.03; 0.21]                | .011772   | -0.12    |
| Thielmann et al. (2020) | Dependence        | 12.94    | 682.91    | 0.53 [0.45; 0.61]                | < .000001 | -0.58    |
| Thielmann et al. (2020) | Sentimentality    | 14.62    | 666.84    | 0.54 [0.47; 0.61]                | < .000001 | -0.73    |

| Extraversion            |                        |       |        |                      |           |       |
|-------------------------|------------------------|-------|--------|----------------------|-----------|-------|
| Thielmann et al. (2020) | Social Self-Esteem     | 6.02  | 673.03 | 0.24 [0.16; 0.32]    | < .000001 | -0.29 |
| Thielmann et al. (2020) | Social Boldness        | 10.03 | 671.00 | 0.38 [0.31; 0.46]    | < .000001 | -0.49 |
| Thielmann et al. (2020) | Sociability            | 21.84 | 674.79 | 0.82 [0.75; 0.89]    | < .000001 | -1.03 |
| Thielmann et al. (2020) | Liveliness             | 6.13  | 670.36 | 0.24 [0.16; 0.32]    | < .000001 | -0.30 |
| Agreeableness           |                        |       |        |                      |           |       |
| Thielmann et al. (2020) | Forgivingness          | -8.12 | 661.90 | -0.35 [-0.43; -0.26] | < .000001 | 0.42  |
| Thielmann et al. (2020) | Gentleness             | 2.24  | 673.53 | 0.08 [0.01; 0.14]    | .025667   | -0.11 |
| Thielmann et al. (2020) | Flexibility            | 3.85  | 679.07 | 0.12 [0.06; 0.18]    | .000131   | -0.18 |
| Thielmann et al. (2020) | Patience               | 1.13  | 666.95 | 0.05 [-0.03; 0.13]   | .257179   | -0.06 |
| Conscientiousness       |                        |       |        |                      |           |       |
| Thielmann et al. (2020) | Organization           | -1.03 | 677.43 | -0.04 [-0.12; 0.04]  | .304205   | 0.05  |
| Thielmann et al. (2020) | Diligence              | -0.47 | 675.67 | -0.02 [-0.09; 0.05]  | .640808   | 0.02  |
| Thielmann et al. (2020) | Perfectionism          | -9.09 | 683.16 | -0.30 [-0.37; -0.24] | < .000001 | 0.41  |
| Thielmann et al. (2020) | Prudence               | -9.78 | 688.10 | -0.29 [-0.35; -0.23] | < .000001 | 0.42  |
| Openness                |                        |       |        |                      |           |       |
| Thielmann et al. (2020) | Aesthetic Appreciation | -2.63 | 699.96 | -0.11 [-0.19; -0.03] | .008711   | 0.11  |

|                            |                   |        |        |                      |           |       |
|----------------------------|-------------------|--------|--------|----------------------|-----------|-------|
| Thielmann et al. (2020)    | Inquisitiveness   | -9.41  | 705.31 | -0.31 [-0.37; -0.25] | < .000001 | 0.37  |
| Thielmann et al. (2020)    | Creativity        | 3.61   | 676.91 | 0.13 [0.06; 0.20]    | .000335   | -0.17 |
| Thielmann et al. (2020)    | Unconventionality | -1.17  | 686.12 | -0.03 [-0.09; 0.02]  | .241510   | 0.05  |
| Lee & Ashton (2018) online | Honesty-Humility  | -16.60 | 625.64 | -0.42 [-0.47; -0.37] | < .000001 | 0.54  |
| Lee & Ashton (2018) online | Emotionality      | 6.59   | 621.63 | 0.18 [0.13; 0.24]    | < .000001 | -0.27 |
| Lee & Ashton (2018) online | Extraversion      | 5.94   | 621.17 | 0.17 [0.11; 0.23]    | < .000001 | -0.25 |
| Lee & Ashton (2018) online | Agreeableness     | -3.67  | 622.12 | -0.09 [-0.15; -0.04] | .000266   | 0.14  |
| Lee & Ashton (2018) online | Conscientiousness | -5.85  | 622.34 | -0.13 [-0.18; -0.09] | < .000001 | 0.23  |
| Lee & Ashton (2018) online | Openness          | 0.05   | 623.70 | 0.00 [-0.04; 0.04]   | .962014   | 0.00  |
| <b>Honesty-Humility</b>    |                   |        |        |                      |           |       |
| Lee & Ashton (2018) online | Sincerity         | -15.68 | 623.78 | -0.53 [-0.60; -0.47] | < .000001 | 0.56  |
| Lee & Ashton (2018) online | Fairness          | -8.36  | 623.11 | -0.35 [-0.43; -0.27] | < .000001 | 0.31  |
| Lee & Ashton (2018) online | Greed Avoidance   | -11.57 | 623.42 | -0.44 [-0.51; -0.36] | < .000001 | 0.42  |
| Lee & Ashton (2018) online | Modesty           | -9.89  | 623.05 | -0.36 [-0.43; -0.29] | < .000001 | 0.37  |
| <b>Emotionality</b>        |                   |        |        |                      |           |       |
| Lee & Ashton (2018) online | Fearfulness       | 8.14   | 622.15 | 0.28 [0.21; 0.35]    | < .000001 | -0.32 |
| Lee & Ashton (2018) online | Anxiety           | 3.69   | 620.63 | 0.17 [0.08; 0.25]    | .000239   | -0.16 |

|                            |                    |       |        |                      |           |       |
|----------------------------|--------------------|-------|--------|----------------------|-----------|-------|
| Lee & Ashton (2018) online | Dependence         | 3.38  | 621.56 | 0.14 [0.06; 0.21]    | .000776   | -0.14 |
| Lee & Ashton (2018) online | Sentimentality     | 3.31  | 621.45 | 0.12 [0.05; 0.19]    | .000998   | -0.13 |
| <b>Extraversion</b>        |                    |       |        |                      |           |       |
| Lee & Ashton (2018) online | Social Self-Esteem | -1.00 | 620.71 | -0.04 [-0.12; 0.04]  | .318145   | 0.04  |
| Lee & Ashton (2018) online | Social Boldness    | 5.94  | 621.09 | 0.22 [0.15; 0.30]    | < .000001 | -0.25 |
| Lee & Ashton (2018) online | Sociability        | 12.76 | 622.34 | 0.47 [0.40; 0.54]    | < .000001 | -0.49 |
| Lee & Ashton (2018) online | Liveliness         | 3.41  | 621.10 | 0.13 [0.06; 0.21]    | .000683   | -0.14 |
| <b>Agreeableness</b>       |                    |       |        |                      |           |       |
| Lee & Ashton (2018) online | Forgivingness      | -3.30 | 621.30 | -0.14 [-0.22; -0.06] | .001036   | 0.14  |
| Lee & Ashton (2018) online | Gentleness         | -1.11 | 622.00 | -0.04 [-0.10; 0.03]  | .266152   | 0.04  |
| Lee & Ashton (2018) online | Flexibility        | -1.48 | 622.23 | -0.05 [-0.10; 0.01]  | .138258   | 0.06  |
| Lee & Ashton (2018) online | Patience           | -5.32 | 621.95 | -0.21 [-0.29; -0.13] | < .000001 | 0.21  |
| <b>Conscientiousness</b>   |                    |       |        |                      |           |       |
| Lee & Ashton (2018) online | Organization       | -2.64 | 621.14 | -0.11 [-0.19; -0.03] | .008447   | 0.11  |
| Lee & Ashton (2018) online | Diligence          | 1.10  | 621.09 | 0.04 [-0.03; 0.11]   | .270885   | -0.05 |
| Lee & Ashton (2018) online | Perfectionism      | -6.59 | 621.16 | -0.22 [-0.28; -0.15] | < .000001 | 0.27  |
| Lee & Ashton (2018) online | Prudence           | -6.88 | 623.29 | -0.20 [-0.25; -0.14] | < .000001 | 0.25  |

|                             |                        | Openness |         |                      |           |       |
|-----------------------------|------------------------|----------|---------|----------------------|-----------|-------|
| Lee & Ashton (2018) online  | Aesthetic Appreciation | -2.13    | 621.79  | -0.09 [-0.16; -0.01] | .033906   | 0.08  |
| Lee & Ashton (2018) online  | Inquisitiveness        | -3.10    | 623.64  | -0.10 [-0.16; -0.04] | .002006   | 0.11  |
| Lee & Ashton (2018) online  | Creativity             | 3.64     | 621.97  | 0.13 [0.06; 0.20]    | .000296   | -0.14 |
| Lee & Ashton (2018) online  | Unconventionality      | 0.01     | 622.06  | 0.00 [-0.05; 0.06]   | .994141   | 0.00  |
| Lee & Ashton (2018) student | Honesty-Humility       | -16.76   | 910.14  | -0.47 [-0.53; -0.42] | < .000001 | 0.73  |
| Lee & Ashton (2018) student | Emotionality           | 16.52    | 903.02  | 0.50 [0.44; 0.56]    | < .000001 | -0.73 |
| Lee & Ashton (2018) student | Extraversion           | 12.73    | 835.52  | 0.39 [0.33; 0.45]    | < .000001 | -0.61 |
| Lee & Ashton (2018) student | Agreeableness          | 3.68     | 891.50  | 0.10 [0.05; 0.16]    | .000245   | -0.16 |
| Lee & Ashton (2018) student | Conscientiousness      | -9.81    | 953.91  | -0.25 [-0.30; -0.20] | < .000001 | 0.41  |
| Lee & Ashton (2018) student | Openness               | -14.24   | 1072.86 | -0.37 [-0.42; -0.31] | < .000001 | 0.55  |
| Honesty-Humility            |                        |          |         |                      |           |       |
| Lee & Ashton (2018) student | Sincerity              | -15.50   | 880.38  | -0.58 [-0.65; -0.50] | < .000001 | 0.70  |
| Lee & Ashton (2018) student | Fairness               | -10.53   | 882.96  | -0.48 [-0.58; -0.39] | < .000001 | 0.48  |
| Lee & Ashton (2018) student | Greed Avoidance        | -13.76   | 933.07  | -0.57 [-0.66; -0.49] | < .000001 | 0.59  |
| Lee & Ashton (2018) student | Modesty                | -4.87    | 888.60  | -0.19 [-0.27; -0.12] | .000001   | 0.22  |
| Emotionality                |                        |          |         |                      |           |       |

|                             |                    |       |        |                      |           |       |
|-----------------------------|--------------------|-------|--------|----------------------|-----------|-------|
| Lee & Ashton (2018) student | Fearfulness        | 16.45 | 927.78 | 0.63 [0.55; 0.70]    | < .000001 | -0.71 |
| Lee & Ashton (2018) student | Anxiety            | 6.72  | 841.87 | 0.33 [0.23; 0.42]    | < .000001 | -0.32 |
| Lee & Ashton (2018) student | Dependence         | 13.41 | 914.66 | 0.59 [0.51; 0.68]    | < .000001 | -0.58 |
| Lee & Ashton (2018) student | Sentimentality     | 10.67 | 876.68 | 0.42 [0.35; 0.50]    | < .000001 | -0.48 |
| <b>Extraversion</b>         |                    |       |        |                      |           |       |
| Lee & Ashton (2018) student | Social Self-Esteem | 5.86  | 805.91 | 0.25 [0.16; 0.33]    | < .000001 | -0.29 |
| Lee & Ashton (2018) student | Social Boldness    | 4.94  | 885.19 | 0.20 [0.12; 0.28]    | .000001   | -0.22 |
| Lee & Ashton (2018) student | Sociability        | 23.94 | 884.76 | 0.96 [0.89; 1.04]    | < .000001 | -1.08 |
| Lee & Ashton (2018) student | Liveliness         | 8.68  | 816.33 | 0.36 [0.28; 0.44]    | < .000001 | -0.43 |
| <b>Agreeableness</b>        |                    |       |        |                      |           |       |
| Lee & Ashton (2018) student | Forgivingness      | 5.38  | 872.13 | 0.25 [0.16; 0.34]    | < .000001 | -0.25 |
| Lee & Ashton (2018) student | Gentleness         | 6.64  | 865.79 | 0.24 [0.17; 0.31]    | < .000001 | -0.31 |
| Lee & Ashton (2018) student | Flexibility        | 0.18  | 928.36 | 0.01 [-0.06; 0.07]   | .853324   | -0.01 |
| Lee & Ashton (2018) student | Patience           | -2.11 | 915.99 | -0.09 [-0.18; -0.01] | .035394   | 0.09  |
| <b>Conscientiousness</b>    |                    |       |        |                      |           |       |
| Lee & Ashton (2018) student | Organization       | -5.57 | 906.32 | -0.25 [-0.34; -0.16] | < .000001 | 0.24  |
| Lee & Ashton (2018) student | Diligence          | -1.52 | 856.80 | -0.06 [-0.13; 0.02]  | .128310   | 0.07  |
| Lee & Ashton (2018) student | Perfectionism      | -6.46 | 895.29 | -0.23 [-0.30; -0.16] | < .000001 | 0.29  |

---

|                             |                        |        |         |                      |           |      |
|-----------------------------|------------------------|--------|---------|----------------------|-----------|------|
| Lee & Ashton (2018) student | Prudence               | -12.91 | 973.69  | -0.42 [-0.48; -0.35] | < .000001 | 0.53 |
| <b>Openness</b>             |                        |        |         |                      |           |      |
| Lee & Ashton (2018) student | Aesthetic Appreciation | -7.39  | 963.07  | -0.33 [-0.42; -0.24] | < .000001 | 0.31 |
| Lee & Ashton (2018) student | Inquisitiveness        | -24.59 | 1138.31 | -0.92 [-0.99; -0.85] | < .000001 | 0.91 |
| Lee & Ashton (2018) student | Creativity             | -1.00  | 977.90  | -0.04 [-0.12; 0.04]  | .319524   | 0.04 |
| Lee & Ashton (2018) student | Unconventionality      | -10.94 | 936.47  | -0.34 [-0.40; -0.28] | < .000001 | 0.47 |

Each row represents three comparisons between the current sample of intellectually gifted MENSA members with the respective reference samples. <sup>1)</sup>  
Degrees of freedom calculated using the Welch–Satterthwaite equation for pooled degrees of freedom.

**Supplementary Table S3.** Comparisons between Thielmann et al. (2020) and the German speaking portion of the current MENSA sample

| Study                   | Factor/facet      | <i>t</i> | <i>df</i> | Mean difference [95% <i>CI</i> ] | <i>p</i>  | <i>d</i> |
|-------------------------|-------------------|----------|-----------|----------------------------------|-----------|----------|
| Thielmann et al. (2020) | Honesty-Humility  | -3.19    | 203.92    | -0.15 [-0.24; -0.06]             | .001657   | 0.23     |
| Thielmann et al. (2020) | Emotionality      | 7.82     | 202.24    | 0.37 [0.28; 0.46]                | < .000001 | -0.64    |
| Thielmann et al. (2020) | Extraversion      | 8.06     | 201.94    | 0.40 [0.31; 0.50]                | < .000001 | -0.68    |
| Thielmann et al. (2020) | Agreeableness     | -0.98    | 202.50    | -0.04 [-0.13; 0.04]              | .326919   | 0.08     |
| Thielmann et al. (2020) | Conscientiousness | -2.11    | 203.31    | -0.09 [-0.17; -0.01]             | .035774   | 0.16     |
| Thielmann et al. (2020) | Openness          | -1.45    | 205.29    | -0.06 [-0.13; 0.02]              | .147938   | 0.10     |
| <b>Honesty-Humility</b> |                   |          |           |                                  |           |          |
| Thielmann et al. (2020) | Sincerity         | -3.65    | 203.20    | -0.23 [-0.36; -0.11]             | .000330   | 0.28     |
| Thielmann et al. (2020) | Fairness          | -1.13    | 203.30    | -0.09 [-0.24; 0.06]              | .258050   | 0.09     |
| Thielmann et al. (2020) | Greed Avoidance   | -4.12    | 203.60    | -0.29 [-0.43; -0.15]             | .000054   | 0.31     |
| Thielmann et al. (2020) | Modesty           | 0.46     | 202.88    | 0.03 [-0.10; 0.15]               | .648936   | -0.04    |
| <b>Emotionality</b>     |                   |          |           |                                  |           |          |
| Thielmann et al. (2020) | Fearfulness       | 5.92     | 203.71    | 0.34 [0.22; 0.45]                | < .000001 | -0.44    |
| Thielmann et al. (2020) | Anxiety           | 1.18     | 201.78    | 0.10 [-0.06; 0.26]               | .239362   | -0.10    |
| Thielmann et al. (2020) | Dependence        | 8.50     | 203.53    | 0.58 [0.45; 0.72]                | < .000001 | -0.64    |

|                         |                    |       |        |                      |           |       |
|-------------------------|--------------------|-------|--------|----------------------|-----------|-------|
| Thielmann et al. (2020) | Sentimentality     | 7.15  | 201.10 | 0.47 [0.34; 0.60]    | < .000001 | -0.65 |
| Extraversion            |                    |       |        |                      |           |       |
| Thielmann et al. (2020) | Social Self-Esteem | 2.50  | 201.49 | 0.18 [0.04; 0.32]    | .013221   | -0.22 |
| Thielmann et al. (2020) | Social Boldness    | 6.08  | 202.43 | 0.38 [0.26; 0.51]    | < .000001 | -0.49 |
| Thielmann et al. (2020) | Sociability        | 12.43 | 201.99 | 0.82 [0.69; 0.95]    | < .000001 | -1.04 |
| Thielmann et al. (2020) | Liveliness         | 5.41  | 202.34 | 0.35 [0.22; 0.48]    | < .000001 | -0.44 |
| Agreeableness           |                    |       |        |                      |           |       |
| Thielmann et al. (2020) | Forgivingness      | -3.13 | 202.20 | -0.21 [-0.34; -0.08] | .001993   | 0.26  |
| Thielmann et al. (2020) | Gentleness         | -0.26 | 202.81 | -0.01 [-0.12; 0.09]  | .795955   | 0.02  |
| Thielmann et al. (2020) | Flexibility        | 1.97  | 203.53 | 0.10 [0.00; 0.20]    | .049947   | -0.15 |
| Thielmann et al. (2020) | Patience           | -2.15 | 202.06 | -0.14 [-0.28; -0.01] | .032465   | 0.18  |
| Conscientiousness       |                    |       |        |                      |           |       |
| Thielmann et al. (2020) | Organization       | 0.63  | 201.79 | 0.05 [-0.10; 0.20]   | .529150   | -0.05 |
| Thielmann et al. (2020) | Diligence          | 2.21  | 202.36 | 0.13 [0.01; 0.25]    | .027890   | -0.18 |
| Thielmann et al. (2020) | Perfectionism      | -5.34 | 202.79 | -0.31 [-0.43; -0.20] | < .000001 | 0.42  |
| Thielmann et al. (2020) | Prudence           | -1.92 | 203.44 | -0.10 [-0.20; 0.00]  | .056367   | 0.14  |
| Openness                |                    |       |        |                      |           |       |

\_\_\_\_\_

|                         |                        |       |        |                      |           |       |
|-------------------------|------------------------|-------|--------|----------------------|-----------|-------|
| Thielmann et al. (2020) | Aesthetic Appreciation | -0.53 | 204.44 | -0.04 [-0.18; 0.10]  | .593235   | 0.04  |
| Thielmann et al. (2020) | Inquisitiveness        | -6.35 | 204.69 | -0.37 [-0.49; -0.26] | < .000001 | 0.44  |
| Thielmann et al. (2020) | Creativity             | 1.91  | 203.49 | 0.11 [0.00; 0.23]    | .057933   | -0.14 |
| Thielmann et al. (2020) | Unconventionality      | -0.28 | 203.69 | -0.01 [-0.11; 0.08]  | .779119   | 0.02  |

---

Each row represents three comparisons between the current sample of intellectually gifted MENSA members with the respective reference samples. <sup>1)</sup>  
Degrees of freedom calculated using the Welch–Satterthwaite equation for pooled degrees of freedom.

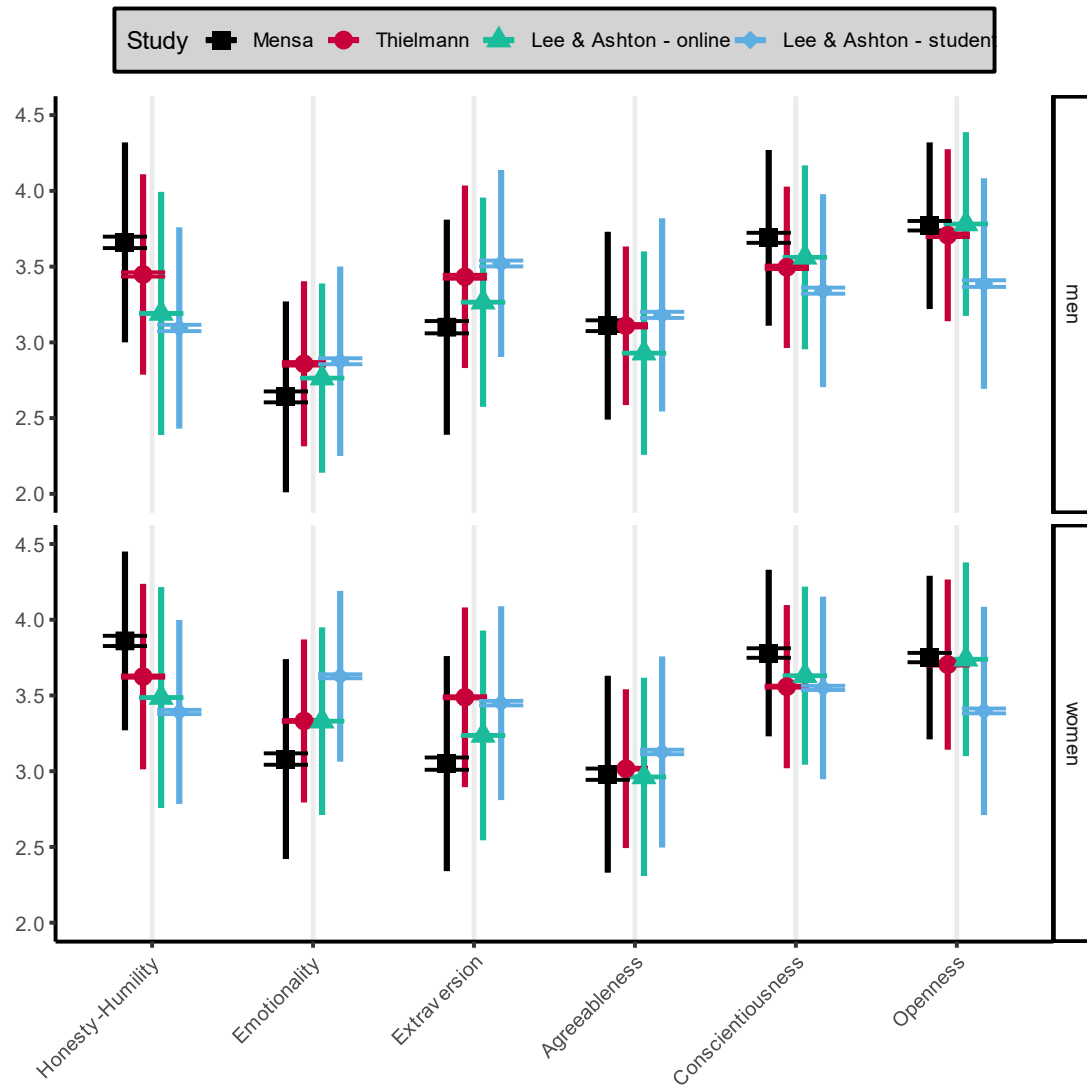

**Supplementary Figure S1.** Means, standard errors, and standard deviations for HEXACO factors, broken down by participant sex. Means are indicated by symbols, standard errors are indicated by whiskers around the symbols, and standard deviations are indicated by colored bars.
